1           **Applying automated patch-clamp to disease modeling: recapitulate**  
2                   **phenotypes of Brugada syndrome using iPSC-CMs**

3  
4   Wener Li<sup>1</sup>, Xiaojing Luo<sup>1</sup> Ying Ulbricht<sup>1</sup> and Kaomei Guan<sup>1\*</sup>

5  
6   <sup>1</sup> Institute of Pharmacology and Toxicology, Technische Universität Dresden, Fetscherstr. 74,  
7   01307 Dresden, Germany

8  
9   \* Corresponding author:

10   Prof. Dr. Kaomei Guan

11   Institute of Pharmacology and Toxicology

12   Technische Universität Dresden

13   Fetscherstr. 74

14   01307 Dresden, Germany

15   Tel: (+49)3514586246

16   Fax: (+49)3514586315

17   E-mail: [kaomei.guan@tu-dresden.de](mailto:kaomei.guan@tu-dresden.de)

18

## 19 **Summary**

20 Recently, there have been great advances in cardiovascular channelopathy modeling and drug  
21 safety pharmacology using human induced pluripotent stem cell-derived cardiomyocytes (iPSC-  
22 CMs). The automated patch-clamp (APC) technique overcomes the disadvantages of manual  
23 patch-clamp (MPC) such as labor intensive and low output. However, it was not clear whether the  
24 data generated by using the APC could be reliably used for iPSC-CM disease modeling. In this  
25 study, we improved the iPSC-CM preparation method by applying 2.5  $\mu$ M blebbistatin (BB, an  
26 excitation-contraction coupling uncoupler) in the whole APC procedures (dissociation, filtration,  
27 storage, and recording). Under non-BB buffered condition, iPSC-CMs in suspension showed a  
28 severe bleb-like morphology, however, BB-supplement leads to significant improvements in  
29 morphology and  $I_{Na}$  recording. We observe no effects of BB on action potential and field potential.  
30 Furthermore, APC faithfully recapitulates the single-cell electrophysiological phenotypes of iPSC-  
31 CMs derived from Brugada syndrome patients, as detected with MPC. Our study indicates that  
32 APC is capable of replacing MPC in the modeling of cardiac channelopathies using human iPSC-  
33 CMs by providing high quality data with higher throughput.

34

## 35 **Keywords**

36 automated patch-clamp, iPSC-derived cardiomyocytes, blebbistatin, calcium paradox, Brugada  
37 syndrome, sodium current, transient outward potassium current

38

## 39 **Introduction**

40 Since the development of patch-clamp techniques for high-resolution current recording from cells  
41 and cell-free membrane patches, the manual patch-clamp (MPC) technology revolutionized  
42 electrophysiological studies (Milligan et al., 2009). Despite the ‘golden standard’ data qualities,  
43 which are highly appreciated, the low data output is the instinctive character of MPC (Dunlop et  
44 al., 2008). So far, the modelling of cardiac channelopathies using human induced pluripotent stem  
45 cell-derived cardiomyocytes (iPSC-CMs) is mostly achieved by studying ion channels using MPC.  
46 For example, MPC was widely used in recordings of  $I_{Na}$  (voltage-gated sodium current, caused by  
47 SCN5A mutation (Liang et al., 2016) and SCN10A (El-Battrawy et al., 2019)),  $I_{CaL}$  (L-type  
48 voltage-gated calcium current, caused by CACNA1C mutation (Estes et al., 2019)), or  $I_{Kr}$  (caused  
49 by KCNH2 mutation (Itzhaki et al., 2011; Shinnawi et al., 2019)) in iPSC-CMs to study cardiac  
50 channelopathies. Furthermore, the labor-intensive and low-throughput nature of MPC has hindered  
51 its large implementation in drug discovery. With these advantages and limitations in mind, the  
52 automated patch-clamp (APC) might play a key role in ion channel research as well as in drug  
53 discovery and safety testing (Stoelzle et al., 2011). However, APC poses often underestimated  
54 challenges to the reproducibility with the cells used (Dunlop et al., 2008).

55 The most challenging step for APC is the acquisition of a large number of single suspension iPSC-  
56 CMs in relaxation stage (Li et al., 2019). It is assumed that the  $Ca^{2+}$ -free period is necessary to  
57 allow cell separation via disruption of the  $Ca^{2+}$ -dependent cadherins (Voigt et al., 2015). However,  
58 after only a few minutes of  $Ca^{2+}$ -free perfusion and  $Ca^{2+}$  repletion, the profound changes to the  
59 cardiomyocytes, including ultrastructural alterations, loss of intracellular components, and  $Na^+$   
60 and  $Ca^{2+}$  gain, were reported (Daly et al., 1987). This phenomenon was first reported as the calcium  
61 paradox (Zimmerman and Hulsmann, 1966). To conquer this paradox, excitation-contraction  
62 uncoupling agents like 2,3-butanedione monoxime (BDM) or blebbistatin (BB) were used (Voigt

63 et al., 2015). Nevertheless, the BDM was reported to have side effects such as reducing *Ito*  
64 (Coulombe et al., 1990), attenuating  $\beta$ -adrenergic response of  $I_{CaL}$  (Julio et al., 2016), and even  
65 inhibiting mitochondrial respiration (Hall and Hausenloy, 2016). On the other hand, BB was rarely  
66 reported to have electrophysiological side effects in rodents (Dou et al., 2007; Fedorov et al., 2007),  
67 but significant effects in the isolated rabbit heart (Brack et al., 2013).

68 In this study, we improved our previously published cell dissociation method suitable for APC (Li  
69 et al., 2019) by supplementing 2.5  $\mu$ M BB in the papain-EDTA-based dissociation solution.  
70 Additionally, 2.5  $\mu$ M BB was also used for strainer filtration and storage of iPSC-CMs. The  
71 extracellular solutions in the liquid handling part of APC were also supplemented with 2.5  $\mu$ M BB.  
72 The protection of fragile iPSC-CMs in suspension by applying BB was beneficial to  
73 electrophysiological studies of ion channels by using APC. Our data demonstrate that BB (2.5  $\mu$ M)  
74 does not exhibit any effects on action potential (AP) and field potential (FP) using human iPSC-  
75 CMs. Furthermore, we conducted ion channel studies in iPSC-CMs from patients with Brugada  
76 syndrome (BrS) by using APC. The data on  $I_{Na}$  and  $I_{to}$  were consistent with our previous data  
77 obtained by using MPC. Our study indicates that APC is capable of replacing MPC in the modeling  
78 of cardiac channelopathies using human iPSC-CMs by providing high quality data with higher  
79 throughput.

## 80 **Results and discussion**

### 81 *Blebbistatin prevents freshly isolated iPSC-CMs from hypercontraction*

82 In the previous study, we reported a method for iPSC-CM dissociation into a single CM suspension  
83 (Li et al., 2019). We can obtain a large quantity of flake- and rod-like relaxation CMs and store  
84 the cells at the relaxation stage for at least 2 hours, which is required for patch-clamp experiments  
85 (Figure 1A). However, we observed the calcium paradox when we switch the solution from 1.1  
86 mM EDTA-buffered RPMI/B27 medium to the physiological external solution (containing 2 mM  
87 CaCl<sub>2</sub>), which is used for APC. Almost all CMs immediately developed severe membrane blebs,  
88 no matter whether they were stored for 2 hours or only 5 minutes (Figure 1B).

89 Ca<sup>2+</sup>-free period (1.1 mM EDTA-buffered RPMI/B27 medium) is necessary for CM separation by  
90 the disruption of the Ca<sup>2+</sup>-dependent cell-cell adhesion mediated by cadherins. However, previous  
91 study showed that switching from Ca<sup>2+</sup>-free to Ca<sup>2+</sup>-repletion condition used for CMs led to  
92 ultrastructural alterations, loss of intracellular components, and Na<sup>+</sup> and Ca<sup>2+</sup> gain (Daly et al.,  
93 1987). To solve this calcium paradox issue, we tested the excitation-contraction uncoupler  
94 blebbistatin (BB, 2.5 μM, myosin II inhibitor (Straight et al., 2003)) in the whole APC procedures  
95 including the dissociation, filtration, storage, and recording steps (Figure 1C). Since BB is light  
96 sensitive (Kolega, 2004), we avoid light exposure during the whole procedure. We found the iPSC-  
97 CMs in suspension maintained the relaxation state even 2 hours after dissociation when the BB-  
98 buffered RPMI/B27 medium containing 0.4 mM Ca<sup>2+</sup> was used as the storage solution (Figure 1D).  
99 To meet the needs of the APC process, where 2 mM Ca<sup>2+</sup>-containing physiological external  
100 solution was used for CM capturing, we switched from BB-buffered RPMI/B27 medium to BB-  
101 buffered external solution containing 2 mM CaCl<sub>2</sub>. We found that the majority of CMs remained  
102 the flake- and rod-like relaxation shapes for all 4 time points (5 min, 30 min, 1 h, and 2 hours)

103 after approximately 1-minute of solution exchange (Figure 1E). To further test whether the flake-  
104 and rod-like shapes could persist throughout the patch progress, generally about 10 minutes, we  
105 recorded the CM morphologies and confirmed the flake-and rod-like shapes were maintained for  
106 at least 10 minutes in BB-buffered physiological external solution (Figure 1F). Our data  
107 demonstrate that BB can be used for preparation of single cell suspension and storage of human  
108 iPSC-CMs. This is consistent with previous studies showing that BB can be used for the isolation  
109 and culture of high quality and viable adult mouse CMs (Hall and Hausenloy, 2016; Kabaeva et  
110 al., 2008).

111

### 112 ***Blebbistatin shows no effects on electrical signals of iPSC-CMs***

113 Since the electrophysiological effects of BB have been controversially reported in different species,  
114 we assessed BB effects on contractility, FP, and AP in human iPSC-CMs. By utilizing the Maestro  
115 Edge multiwell microelectrode array (MEA) and impedance system, we could record the FP and  
116 impedance-based contractility in the same culture of iPSC-CMs before and after BB treatment for  
117 10 min (Figure 2A-C). The contractility was abolished in most iPSC-CM cultures after the  
118 application of 2.5  $\mu$ M BB for 3-5 minutes (Figure 2A, B), which is mainly due to the binding of  
119 BB to myosin II. However, the FP metrics such as spontaneous excitation frequency (Hz), spike  
120 amplitude (mV), and conduction velocity (cm/s) did not alter (Figure 2B and C). These data  
121 indicate that the BB treatment has no effects on electrical field potential of human iPSC-CMs but  
122 prevents their beating. Our study is consistent with previous studies, in which the treatments with  
123 1  $\mu$ M (Guo et al., 2011) and 10  $\mu$ M (Qian et al., 2017) BB did not show any effects on FP of  
124 human iPSC-CMs. Moreover, with the prolonged incubation of human iPSC-CMs with 2.5  $\mu$ M  
125 BB till 1 hour, we did not observe differences in FP parameters (Supplementary Figure 1).

126 We then investigated the effects of 2.5  $\mu$ M BB treatment on AP morphologies of iPSC-CMs by  
127 using MPC when the cells were paced at 0.5 Hz. We did not observe any differences in AP duration  
128 at 90% repolarization (APD90), AP amplitude (APA), and resting membrane potential (RMP)  
129 before and after the treatment with 2.5  $\mu$ M BB for 10 min (Figure 2D and E). Similar results  
130 showing no effect of treatment with 10  $\mu$ M BB for 5 min on AP duration were reported in isolated  
131 mouse CMs (Dou et al., 2007). Furthermore, superfusion of an explanted zebrafish embryonic  
132 heart with BB (1, 5 and 10  $\mu$ M) was reported to have no effects on AP morphology and AP  
133 parameters including APD, RMP and maximum upstroke velocity in both atrial and ventricular  
134 CMs (Jou et al., 2010). Superfusion with 10  $\mu$ M BB for 60 min also did not induce any changes in  
135 AP morphologies paced at 2.5 Hz as registered by microelectrodes from preparations of rabbit  
136 atria and ventricles (Fedorov et al., 2007). However, another study showed that the 60-min  
137 perfusion with BB (5  $\mu$ M) significantly prolonged optically recorded APs and corrected QT  
138 interval on ECG (Brack et al., 2013).

139

#### 140 ***Blebbistatin does not alter the magnitude of intracellular calcium transient***

141 To study whether 2.5  $\mu$ M BB application affects intracellular calcium transient, human iPSC-CMs  
142 were labelled with the ratio-metric fluorescent calcium indicator Fura-2 (Figure 2F, G). Our data  
143 showed that BB has no effect on Ca<sup>2+</sup> transient morphology as well as parameters such as  
144 amplitude, systolic Ca<sup>2+</sup> level (Figure 2F, G), or decay rate (before:  $1.03 \pm 0.015$ ; after:  $1.04 \pm$   
145  $0.014$ ;  $p = 0.576$ ). After 5 min, 2.5  $\mu$ M BB application led to the reduction of diastolic Ca<sup>2+</sup> level  
146 from  $0.76 \pm 0.009$  to  $0.71 \pm 0.009$  ( $n = 18$  from 4 differentiations, paired,  $p < 0.001$ ) in iPSC-CMs  
147 paced at 0.25 Hz. Similar results were observed in rat cardiomyocytes loaded with the ratio-metric  
148 fluorescent calcium indicator Indo-1 (Farman et al., 2008). Whereas Ca<sup>2+</sup> transient amplitude, and

149 the decay were not affected by 1 h application of 0.5  $\mu\text{M}$  Blebbistatin, diastolic  $\text{Ca}^{2+}$  level revealed  
150 a slight reduction after BB application (Farman et al., 2008). Notably, BB application resulted in  
151 significant elevations of diastolic fluorescence level in rat cardiomyocytes labelled with the non-  
152 ratiometric fluorescent calcium indicator Fluo-4 (Farman et al., 2008) or labelled with another  
153 non-ratiometric indicator Fluo-5F (Fedorov et al., 2007) whereas BB did not affect the intracellular  
154  $\text{Ca}^{2+}$  transient amplitude as assessed by either Fluo-4 or Fluo-5F. Since both Fluo-4 and Fluo-5F  
155 are not ratio-metric, therefore, the increase in diastolic fluorescence must be interpreted with  
156 caution. Given differences observed by applications of different ratio-metric or non-ratiometric  
157 fluorescent indicators, we can speculate that light-sensitive BB tangles with different dyes.

158

### 159 ***Blebbistatin maintains the function of sodium channels***

160 To evaluate whether the relaxation morphologies and state of iPSC-CMs achieved by BB  
161 supplement during the whole experimental process (dissociation, straining, storage, and APC  
162 recording) make significant differences for current recording, we first recorded  $I_{\text{Na}}$  by using  
163 physiological external solution containing 140 mM  $[\text{Na}^+]_o$  (Figure 3A). Unlike the control group  
164 without BB, in the group with 2.5  $\mu\text{M}$  BB supplement, the majority of  $I_{\text{Na}}$  activation stages lost  
165 voltage control (Figure 3A), a sign of too high extracellular  $\text{Na}^+$  concentration for patch-clamp.  
166 We even have four ‘out-of-gain’ recordings using the APC gain setting (0.5 mV/pA for a maximum  
167 of 20 nA). In the control group without BB, the peak  $I_{\text{Na}}$  ( $-183.4 \pm 22.5$  pA/pF) appeared at -15  
168 mV while in the group with BB, the peak  $I_{\text{Na}}$  of  $-307.2 \pm 35.1$  pA/pF ( $n = 51$ ) was found at -25 mV  
169 (Figure 3B). These results suggest that BB supplement make a significant improvement for  $I_{\text{Na}}$   
170 recording.



171 To prevent the loss of voltage control during  $I_{Na}$  recording, we reduced the extracellular  $Na^+$   
172 concentration to 50 mM (Figure 4A, B). Under this condition, none of the iPSC-CMs in the group  
173 with BB showed the ‘out-of-gain’  $I_{Na}$ . To this end, we repeated  $I_{Na}$  recording using APC in  
174 previously published BrS disease models (Li et al., 2020). In the presence of 2.5  $\mu$ M BB, single  
175 iPSC-CMs were obtained from two healthy donors (Ctrl1 and Ctrl2) and two BrS patients (BrS1  
176 and BrS2, harboring the same *SCN5A* p.S1812X mutation. As shown in Figure 4A, the  $I_{Na}$  density  
177 in BrS-CMs was dramatically lower compared to that in Ctrl-CMs. Under the testing potentials  
178 ranging from -40 mV to 15 mV,  $I_{Na}$  densities in both BrS1- and BrS2-CMs were significantly  
179 smaller than in Ctrl1- and Ctrl2-CMs (Figure 4B). The peak  $I_{Na}$  appeared at -20 mV in Ctrl1- and  
180 Ctrl2-CMs showed as  $-114.9 \pm 11.7$  and  $-117.5 \pm 20.7$  pA/pF, and in BrS1- and BrS2-CMs  
181 presented as  $-63.5 \pm 7.3$  and  $-45.9 \pm 6.0$  pA/pF, respectively. These results generated by using APC  
182 were consistent with our previous results acquired using MPC, which also revealed a more than  
183 50% reduction of  $I_{Na}$  density in BrS-CMs (Li et al., 2020).

184

#### 185 ***Blebbistatin has no effect on $I_{to}$ and $I_{CaL}$ recording***

186 The peak  $I_{to}$  at +60 mV in BrS1-CMs ( $9.7 \pm 2$  pA/pF) and BrS2-CMs ( $10.8 \pm 2.2$  pA/pF) were  
187 significantly bigger than those in Ctrl1-CMs ( $4.7 \pm 0.5$  pA/pF) and Ctrl2-CMs ( $5.7 \pm 0.8$  pA/pF)  
188 (Figure 4C and D). The  $I_{to}$  recorded with APC are in line with our previous publication of MPC  
189 results: the  $I_{to}$  at +60 mV in BrS1-CMs and BrS2-CMs were 2.4 and 1.9 times bigger than those  
190 in Ctrl-CMs (Li et al., 2020). Furthermore, consistent with our MPC data, we did not observe any  
191  $I_{CaL}$  density differences between Ctrl-CMs and BrS-CMs (Figure 4 E, F).

192 Taken together, we firstly improve iPSC-CM preparation for APC recording in this study. By  
193 supplement of BB to the whole procedures (dissociation, filtration, storage, and recording), we can  
194 make significant promotions not only in obtaining relax iPSC-CMs but also in  $I_{Na}$  recording.  
195 Furthermore, APC faithfully recapitulates the single-cell electrophysiological phenotypes of iPSC-  
196 CMs derived from BrS patients, as detected with MPC. Our study suggests APC is capable of  
197 replacing MPC in the modeling of cardiac channelopathies using human iPSC-CMs by providing  
198 high quality data with higher throughput.

199

## 200 **Experimental procedures**

### 201 *Directed differentiation of iPSCs into iPSC-CMs*

202 Directed differentiation of iPSCs into ventricular-like CMs was induced by modulating WNT  
203 signaling as previously described (Cyganek et al., 2018). When iPSCs (cultured on 12-well plates)  
204 reached around 90% confluency, differentiation was initiated by changing medium into cardio  
205 differentiation medium (RPMI 1640 with GlutaMax and HEPES (Thermo Fisher Scientific), 0.5  
206 mg/ml human recombinant albumin (Sigma-Aldrich) and 0.2 mg/ml L-ascorbic acid 2-phosphate  
207 (Sigma-Aldrich)) supplemented with 4  $\mu$ M of the GSK3 $\beta$  inhibitor CHIR99021 (Millipore). After  
208 48 hours, the medium was changed to fresh cardio differentiation medium supplemented with 5  
209  $\mu$ M IWP2 (WNT signaling inhibitor, Millipore) for another two days. Afterward, cells were  
210 cultured in the cardio differentiation medium for another 4 days. From day eight on, the cardiac  
211 differentiation medium was replaced by RPMI/B27 medium (RPMI 1640 with GlutaMax and  
212 HEPES, supplemented with 2% B27 with insulin (Thermo Fisher Scientific)). On day 20, beating  
213 cardiomyocytes were detached from plates with 1 mg/ml collagenase B (Worthington  
214 Biochemical), dissociated with 0.25% Trypsin/EDTA (Thermo Fisher Scientific), and replated  
215 into Geltrex-coated 6-well plates at a density of 800,000 cells/well. Afterward, iPSC-CMs were  
216 cultured in RPMI/B27 medium for around 3 months.

217

### 218 *Dissociation of 3-month-old iPSC-CMs into single cells for automated patch-clamp*

219 Our previously published dissociation method was used in this study with some modifications (Li  
220 et al., 2019). Collagenase B (1 mg/ml) was used to pre-treat 3-month-old iPSC-CMs until the layer  
221 of cardiomyocytes detached. The layer of cardiomyocytes was transferred into a 3.5-cm dish and  
222 then treated with 2 ml of 20 U/ml papain (Sigma-Aldrich) dissolved in 1.1 mM EDTA buffered

223 RPMI/B27 medium containing 2.5  $\mu$ M BB (Sigma-Aldrich, dissolved in DMSO as 10 mM stock)  
224 for 10 min. A fire-polished glass Pasteur pipette was used to gently agitate the cells to release  
225 single iPSC-CMs. The cell suspension was filtered through a 30- $\mu$ m strainer (MACS  
226 SmartStrainers, Miltenyi Biotec) to remove cell clusters and was centrifuged for 1 min at 50 g.  
227 After gently aspirating the supernatant, the cell pellet was resuspended into 2 ml of 1.1 mM EDTA  
228 buffered RPMI/B27 medium (+2.5  $\mu$ M BB) and then filtered through a 10- $\mu$ m strainer  
229 (pluriStrainer<sup>®</sup>, pluriSelect) to collect larger iPSC-CMs. The cells were collected with 2 ml of  
230 RPMI/B27 medium with 2.5  $\mu$ M BB and then centrifuged for 1 min at 50 g. After removing the  
231 supernatant, the cell pellet was gently aspirated and further stored in 2.5  $\mu$ M BB containing  
232 RPMI/B27 medium at 4 °C for 2 h.

233

#### 234 ***Contractility and FP measurements***

235 For the measurements of contractility and FP together in the same culture, the Maestro Edge  
236 multiwell microelectrode array (MEA) and impedance system (Axion BioSystems) was used. The  
237 3-month-old iPSC-CMs were seeded into Cytoview MEA 6-well or 24-well plate (Axion  
238 BioSystems) according to the protocol provided by Axion BioSystems. Every well was coated  
239 with Geltrex<sup>®</sup> (Thermo Fisher Scientific) for at least 1 hour. The 0.25% Trypsin-EDTA dissociated  
240 cells were seeded as density 10,000/8  $\mu$ l to one well of the plate. The medium was changed one  
241 day after plating and thereafter every two days until day 6. On day 6, electrical FP and the  
242 impedance-based contractility in human iPSC-CMs were measured before and after 2.5  $\mu$ M BB  
243 treatment. After calibrating for 10 minutes, the spontaneous recordings were carried out at 37 °C  
244 and 5% CO<sub>2</sub> using AxIS Navigator software (Axion BioSystems). The sample rates were 12,500  
245 Hz for FP and 40 Hz for contractility. Spontaneous beating frequency was defined by the reciprocal

246 of averaged inter-beat interval. The spontaneous beating frequency, FP amplitude, and conduction  
247 velocity were generated by AxIS Navigator and further analyzed by AxIS Metric Plotting Tool  
248 (Axion BioSystems). The mainstream conduction velocity values were averaged for one culture.

249

### 250 ***Manual patch-clamp for AP measurement***

251 iPSC-CMs around day 90 were enzymatically dissociated into single cells and seeded on 5 mm Ø  
252 coverslips distributed in 35-mm dishes. After around 10 days for recovery, the paced APs of a  
253 single iPSC-CM were measured at room temperature with a ruptured whole-cell current clamp  
254 using HEKA EPC10 amplifier and Patchmaster (HEKA Elektronik). The pipette and extracellular  
255 solutions for paced APs recordings were listed in Supplementary Table 1. The pacing stimulus was  
256 0.5 Hz. Pipette potentials were corrected for liquid junction potentials. More than 5 continuously  
257 stable paced APs were chosen and analyzed using LabChart® (ADInstruments) to determine  
258 APD90, APA, and RMP.

259

### 260 ***Calcium transient measurement***

261 Paced whole-cell calcium transients were measured according to our previous publication (Luo et  
262 al., 2020). CMs around day 80 were dissociated and replated on coverslips at a density of 200,000  
263 cells/well (6 well plate). Cells recovered for at least 10 days were loaded with Fura-2 (Thermo  
264 Fisher Scientific) at a final concentration of 5 µM in RPMI/B27 medium for 30 min at 37 °C and  
265 washed twice with the medium. Before measurement, cells were incubated for 10 min to enable  
266 complete de-esterification of intracellular Fura-2. Calcium transients were recorded using a 40×  
267 objective on an Olympus IX70 microscope fitted with an IonWizard software (IonOptix) at 35 °C.

268 Samples were excited at 340 and 380 nm with a switching frequency of 200 Hz and the emitted  
269 fluorescence was collected at 510 nm. The cytosolic  $\text{Ca}^{2+}$  level was measured as the ratio of  
270 fluorescence at 340 and 380 nm (340/380 nm) in Tyrode's solution. To minimize the phototoxicity  
271 and photoinactivation effects of BB, the recording was paused during the BB exposure time. To  
272 normalize the  $\text{Ca}^{2+}$  transient frequency, iPSC-CMs were field-stimulated using a MyoPacer  
273 (IonOptix) at a pacing frequency of 0.25 Hz (6 V, 10 ms). The monotonic transient analysis was  
274 performed using the LabChart<sup>®</sup> (ADInstruments) and the following parameters were determined:  
275 peak amplitude of  $\text{Ca}^{2+}$  transients (the Fura-2 ratio at systole subtracted by the Fura-2 ratio at  
276 diastole), decay rate ( $\tau$ ), as well as duration of  $\text{Ca}^{2+}$  transients.

277

### 278 *Automated patch-clamp*

279 All experiments were performed at room temperature using an automated patch-clamp system  
280 (Patchliner Quattro, Nanion Technologies GmbH) with low resistance NPC-16 chips. The pipette  
281 and extracellular solutions for  $I_{Na}$ ,  $I_{to}$ , and  $I_{CaL}$  recordings were listed in Supplementary Table 1.  
282 From a holding potential of -100 mV,  $I_{Na}$  was recorded using voltage steps from -80 to +70 mV  
283 for 20 ms in 5 mV steps at an interval of 2000 ms (shown as an inset in Figure 3B and 4B).  
284 Nifedipine (10  $\mu\text{M}$ ) was used to block  $I_{CaL}$ .  $I_{to}$  was recorded by increasing the testing potential  
285 stepwise from -40 mV to +60 mV in 10 mV steps from a holding potential of -90 mV with a 20  
286 ms pre-pulse to -35 mV to inactivate  $I_{Na}$  (shown as an inset in Figure 4D).  $\text{CdCl}_2$  (0.5 mM) was  
287 used to block calcium current. Each pulse lasted for 400 ms, the sweep interval was 10 s. To record  
288  $I_{CaL}$ , cells were depolarized for 100 ms to voltages between -80 to 50 mV from a holding potential  
289 of -90 mV, the sweep interval was 3 s (shown as an inset in Figure 4F). Currents were sampled at  
290 25 kHz and low-pass-filtered at 2.9 kHz. The liquid junction potentials and series resistance were

291 not compensated for all recordings. The data were exported by using Patchmaster and further  
292 analyzed with Graph Pad Prism 5 (GraphPad Software, Inc).

293

#### 294 ***Statistics***

295 Statistical analysis was performed with GraphPad Prism 5 using the paired Student's *t*-test to  
296 compare differences between two paired groups, and the two-way ANOVA with Bonferroni post-  
297 test for comparison of more groups and conditions. Data are presented as the mean  $\pm$  standard error  
298 of the mean (SEM). Results were considered statistically significant when the p-value was  $<0.05$ .

299

#### 300 **Author Contributions**

301 WL and KG conceived the study and designed experiments. WL, XL, and YU performed  
302 experiments and acquired data. WL, XL, and KG analyzed and interpreted the data. WL and KG  
303 wrote the manuscript.

304

#### 305 **Acknowledgments**

306 We thank Konstanze Fischer, Jessie Pöche, and Judith Müller for excellent technical assistance.  
307 The authors would like to express great appreciation to Free State of Saxony and the European  
308 Union EFRE (SAB project “PhänoKard” and “PhenoCor” to K.G.).

309

310

## 311 References

- 312 Brack, K.E., Narang, R., Winter, J., and Ng, G.A. (2013). The mechanical uncoupler blebbistatin  
313 is associated with significant electrophysiological effects in the isolated rabbit heart. *Exp Physiol*  
314 *98*, 1009-1027.
- 315 Coulombe, A., Lefevre, I.A., Deroubaix, E., Thuringer, D., and Coraboeuf, E. (1990). Effect of  
316 2,3-butanedione 2-monoxime on slow inward and transient outward currents in rat ventricular  
317 myocytes. *Journal of molecular and cellular cardiology* *22*, 921-932.
- 318 Cyganek, L., Tiburcy, M., Sekeres, K., Gerstenberg, K., Bohnenberger, H., Lenz, C., Henze, S.,  
319 Stauske, M., Salinas, G., Zimmermann, W.H., et al. (2018). Deep phenotyping of human induced  
320 pluripotent stem cell-derived atrial and ventricular cardiomyocytes. *JCI Insight* *3*.
- 321 Daly, M.J., Elz, J.S., and Nayler, W.G. (1987). Contracture and the calcium paradox in the rat  
322 heart. *Circulation research* *61*, 560-569.
- 323 Dou, Y., Arlock, P., and Arner, A. (2007). Blebbistatin specifically inhibits actin-myosin  
324 interaction in mouse cardiac muscle. *American Journal of Physiology-Cell Physiology* *293*,  
325 C1148-C1153.
- 326 Dunlop, J., Bowlby, M., Peri, R., Vasilyev, D., and Arias, R. (2008). High-throughput  
327 electrophysiology: an emerging paradigm for ion-channel screening and physiology. *Nat Rev*  
328 *Drug Discov* *7*, 358-368.
- 329 El-Battrawy, I., Albers, S., Cyganek, L., Zhao, Z., Lan, H., Li, X., Xu, Q., Kleinsorge, M.,  
330 Huang, M., Liao, Z., et al. (2019). A cellular model of Brugada syndrome with SCN10A variants  
331 using human-induced pluripotent stem cell-derived cardiomyocytes. *Europace*.
- 332 Estes, S.I., Ye, D., Zhou, W., Dotzler, S.M., Tester, D.J., Bos, J.M., Kim, C.S.J., and Ackerman,  
333 M.J. (2019). Characterization of the CACNA1C-R518C Missense Mutation in the Pathobiology  
334 of Long-QT Syndrome Using Human Induced Pluripotent Stem Cell Cardiomyocytes Shows  
335 Action Potential Prolongation and L-Type Calcium Channel Perturbation. *Circ Genom Precis*  
336 *Med* *12*, e002534.
- 337 Farman, G.P., Tachampa, K., Mateja, R., Cazorla, O., Lacampagne, A., and de Tombe, P.P.  
338 (2008). Blebbistatin: use as inhibitor of muscle contraction. *Pflugers Arch* *455*, 995-1005.
- 339 Fedorov, V.V., Lozinsky, I.T., Sosunov, E.A., Anyukhovskiy, E.P., Rosen, M.R., Balke, C.W.,  
340 and Efimov, I.R. (2007). Application of blebbistatin as an excitation-contraction uncoupler for  
341 electrophysiologic study of rat and rabbit hearts. *Heart rhythm : the official journal of the Heart*  
342 *Rhythm Society* *4*, 619-626.
- 343 Guo, L., Abrams, R.M., Babiarz, J.E., Cohen, J.D., Kameoka, S., Sanders, M.J., Chiao, E., and  
344 Kolaja, K.L. (2011). Estimating the risk of drug-induced proarrhythmia using human induced  
345 pluripotent stem cell-derived cardiomyocytes. *Toxicol Sci* *123*, 281-289.
- 346 Hall, A.R., and Hausenloy, D.J. (2016). Mitochondrial respiratory inhibition by 2,3-butanedione  
347 monoxime (BDM): implications for culturing isolated mouse ventricular cardiomyocytes.  
348 *Physiological reports* *4*, e12606.
- 349 Itzhaki, I., Maizels, L., Huber, I., Zwi-Dantsis, L., Caspi, O., Winterstern, A., Feldman, O.,  
350 Gepstein, A., Arbel, G., Hammerman, H., et al. (2011). Modelling the long QT syndrome with  
351 induced pluripotent stem cells. *Nature* *471*, 225-229.
- 352 Jou, C.J., Spitzer, K.W., and Tristani-Firouzi, M. (2010). Blebbistatin effectively uncouples the  
353 excitation-contraction process in zebrafish embryonic heart. *Cellular physiology and*  
354 *biochemistry : international journal of experimental cellular physiology, biochemistry, and*  
355 *pharmacology* *25*, 419-424.



356 Julio, A.-C., Ana Iris, L.-M., Loipa, G.-M., and Julio, L.A. (2016). 2,3-Butanedione monoxime  
357 attenuates the  $\beta$ -adrenergic response of the L-type  $Ca^{2+}$  current in rat ventricular  
358 cardiomyocytes. *Journal of Pharmacy & Pharmacognosy Research* 4, 206-216.

359 Kabaeva, Z., Zhao, M., and Michele, D.E. (2008). Blebbistatin extends culture life of adult  
360 mouse cardiac myocytes and allows efficient and stable transgene expression. *Am J Physiol*  
361 *Heart Circ Physiol* 294, H1667-1674.

362 Kolega, J. (2004). Phototoxicity and photoinactivation of blebbistatin in UV and visible light.  
363 *Biochem Biophys Res Commun* 320, 1020-1025.

364 Li, W., Luo, X., Ulbricht, Y., Wagner, M., Piorkowski, C., El-Armouche, A., and Guan, K.  
365 (2019). Establishment of an automated patch-clamp platform for electrophysiological and  
366 pharmacological evaluation of hiPSC-CMs. *Stem cell research* 41, 101662.

367 Li, W., Stauske, M., Luo, X., Wagner, S., Vollrath, M., Mehnert, C.S., Schubert, M., Cyganek,  
368 L., Chen, S., Hasheminasab, S.M., et al. (2020). Disease Phenotypes and Mechanisms of iPSC-  
369 Derived Cardiomyocytes From Brugada Syndrome Patients With a Loss-of-Function SCN5A  
370 Mutation. *Front Cell Dev Biol* 8, 592893.

371 Liang, P., Sallam, K., Wu, H., Li, Y., Itzhaki, I., Garg, P., Zhang, Y., Vermglinchan, V., Lan, F.,  
372 Gu, M., et al. (2016). Patient-Specific and Genome-Edited Induced Pluripotent Stem Cell-  
373 Derived Cardiomyocytes Elucidate Single-Cell Phenotype of Brugada Syndrome. *Journal of the*  
374 *American College of Cardiology* 68, 2086-2096.

375 Luo, X., Li, W., Kunzel, K., Henze, S., Cyganek, L., Strano, A., Poetsch, M.S., Schubert, M.,  
376 and Guan, K. (2020). IP3R-Mediated Compensatory Mechanism for Calcium Handling in  
377 Human Induced Pluripotent Stem Cell-Derived Cardiomyocytes With Cardiac Ryanodine  
378 Receptor Deficiency. *Front Cell Dev Biol* 8, 772.

379 Milligan, C.J., Li, J., Sukumar, P., Majeed, Y., Dallas, M.L., English, A., Emery, P., Porter, K.E.,  
380 Smith, A.M., McFadzean, I., et al. (2009). Robotic multiwell planar patch-clamp for native and  
381 primary mammalian cells. *Nature protocols* 4, 244-255.

382 Qian, F., Huang, C., Lin, Y.D., Ivanovskaya, A.N., O'Hara, T.J., Booth, R.H., Creek, C.J.,  
383 Enright, H.A., Soscia, D.A., Belle, A.M., et al. (2017). Simultaneous electrical recording of  
384 cardiac electrophysiology and contraction on chip. *Lab on a chip* 17, 1732-1739.

385 Shinnawi, R., Shaheen, N., Huber, I., Shiti, A., Arbel, G., Gepstein, A., Ballan, N., Setter, N.,  
386 Tijssen, A.J., Borggrefe, M., et al. (2019). Modeling Reentry in the Short QT Syndrome With  
387 Human-Induced Pluripotent Stem Cell-Derived Cardiac Cell Sheets. *Journal of the American*  
388 *College of Cardiology* 73, 2310-2324.

389 Stoelzle, S., Obergrussberger, A., Bruggemann, A., Haarmann, C., George, M., Kettenhofen, R.,  
390 and Fertig, N. (2011). State-of-the-Art Automated Patch Clamp Devices: Heat Activation,  
391 Action Potentials, and High Throughput in Ion Channel Screening. *Front Pharmacol* 2, 76.

392 Straight, A.F., Cheung, A., Limouze, J., Chen, I., Westwood, N.J., Sellers, J.R., and Mitchison,  
393 T.J. (2003). Dissecting temporal and spatial control of cytokinesis with a myosin II Inhibitor.  
394 *Science* 299, 1743-1747.

395 Voigt, N., Pearman, C.M., Dobrev, D., and Dibb, K.M. (2015). Methods for isolating atrial cells  
396 from large mammals and humans. *Journal of molecular and cellular cardiology* 86, 187-198.

397 Zimmerman, A.N., and Hulsmann, W.C. (1966). Paradoxical influence of calcium ions on the  
398 permeability of the cell membranes of the isolated rat heart. *Nature* 211, 646-647.

399

## 400 **Figure Titles and Legends**

**Figure 1**

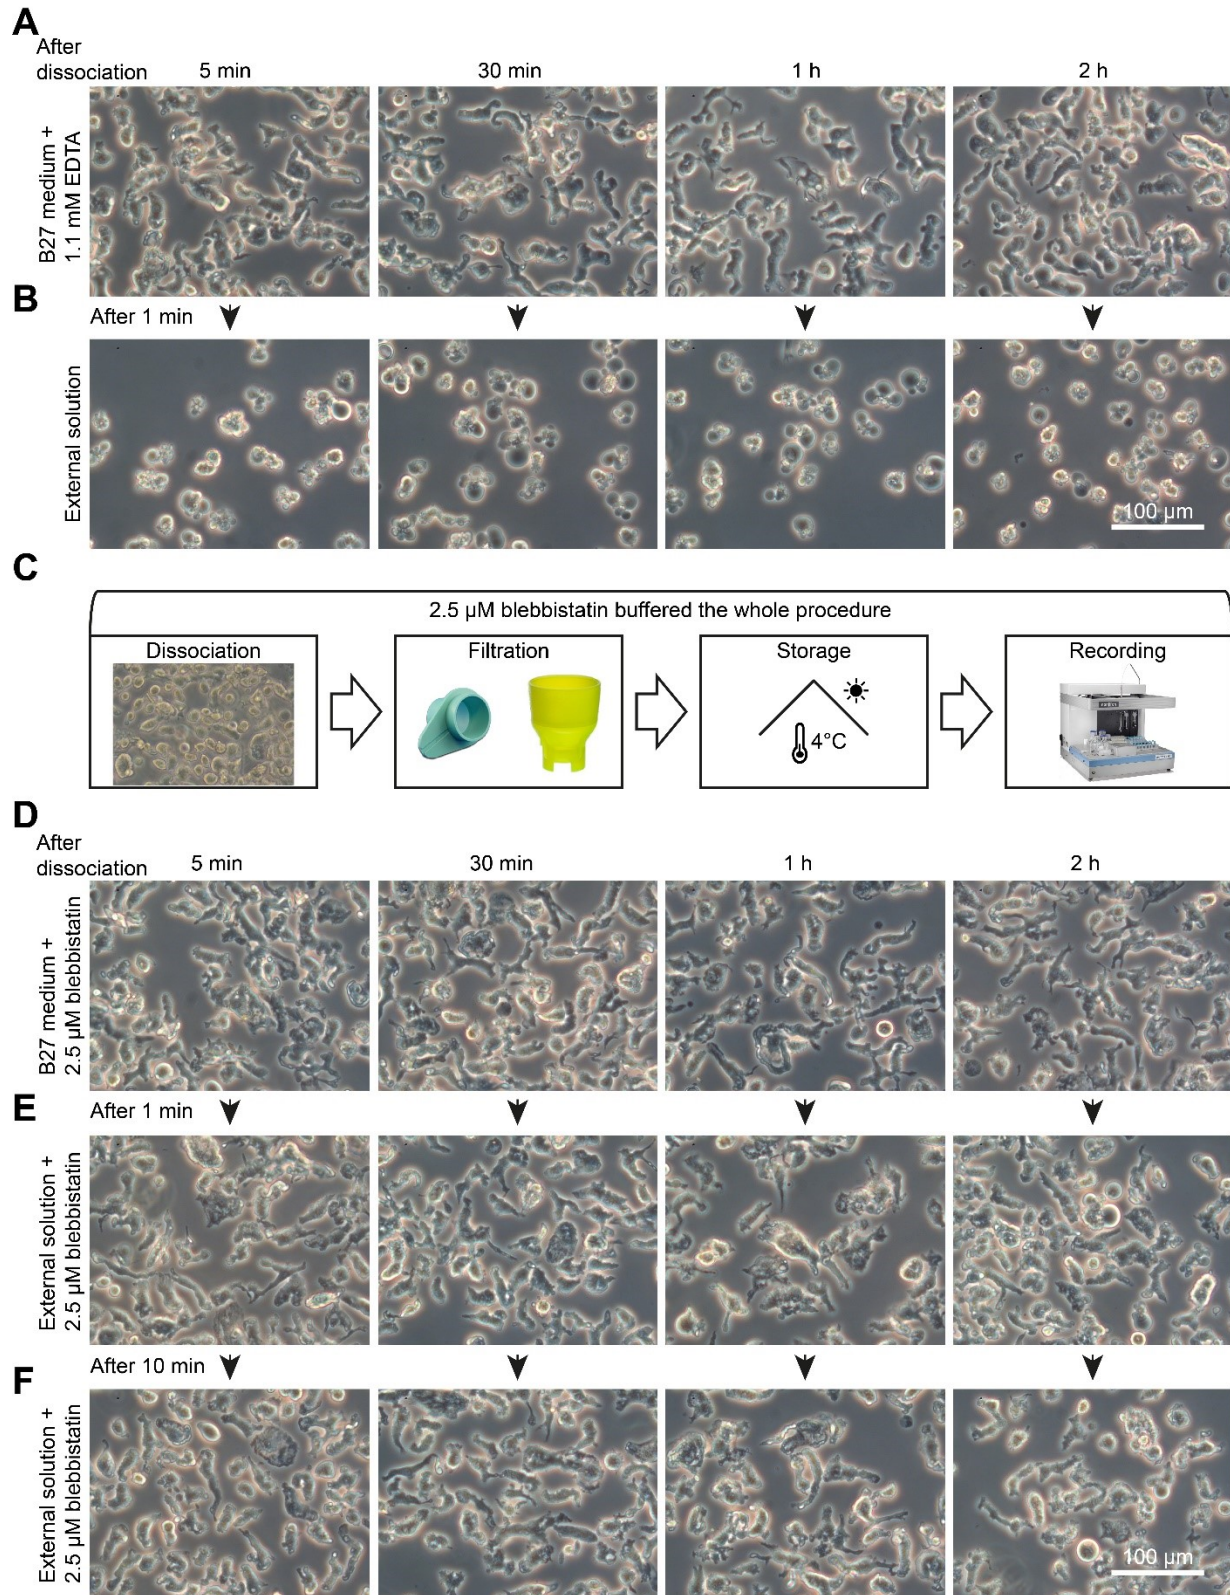

402 **Figure 1. Morphological observations of dissociated iPSC-CMs in suspension under different**  
403 **conditions.** (A) The morphologies of iPSC-CMs in suspension in 1.1 mM EDTA-buffered  
404 RPMI/B27 medium for 5 min, 30 min, 1 hour, and 2 hours. (B) The morphological changes after  
405 the CMs are transferred from EDTA-buffered RPMI/B27 medium to 2 mM Ca<sup>2+</sup>-containing  
406 physiological external solution, corresponding to the 4 different time points. (C) For the improved  
407 iPSC-CM preparation method, 2.5 μM BB was used to buffer the whole procedure including cell  
408 dissociation, filtration, storage, and recording. (D) The morphologies of iPSC-CMs in 2.5 μM BB-  
409 buffered RPMI/B27 medium for 5 min, 30 min, 1 hour, and 2 hours. (E-F) Correspondingly to  
410 different time points, shown are morphologies after the identical CMs transferred from BB-  
411 buffered RPMI/B27 medium to BB-buffered, 2 mM Ca<sup>2+</sup>-containing physiological external  
412 solution for 1 min (E) and 10 min (F). Scale bar: 100 μm.

413

414

415

**Figure 2**

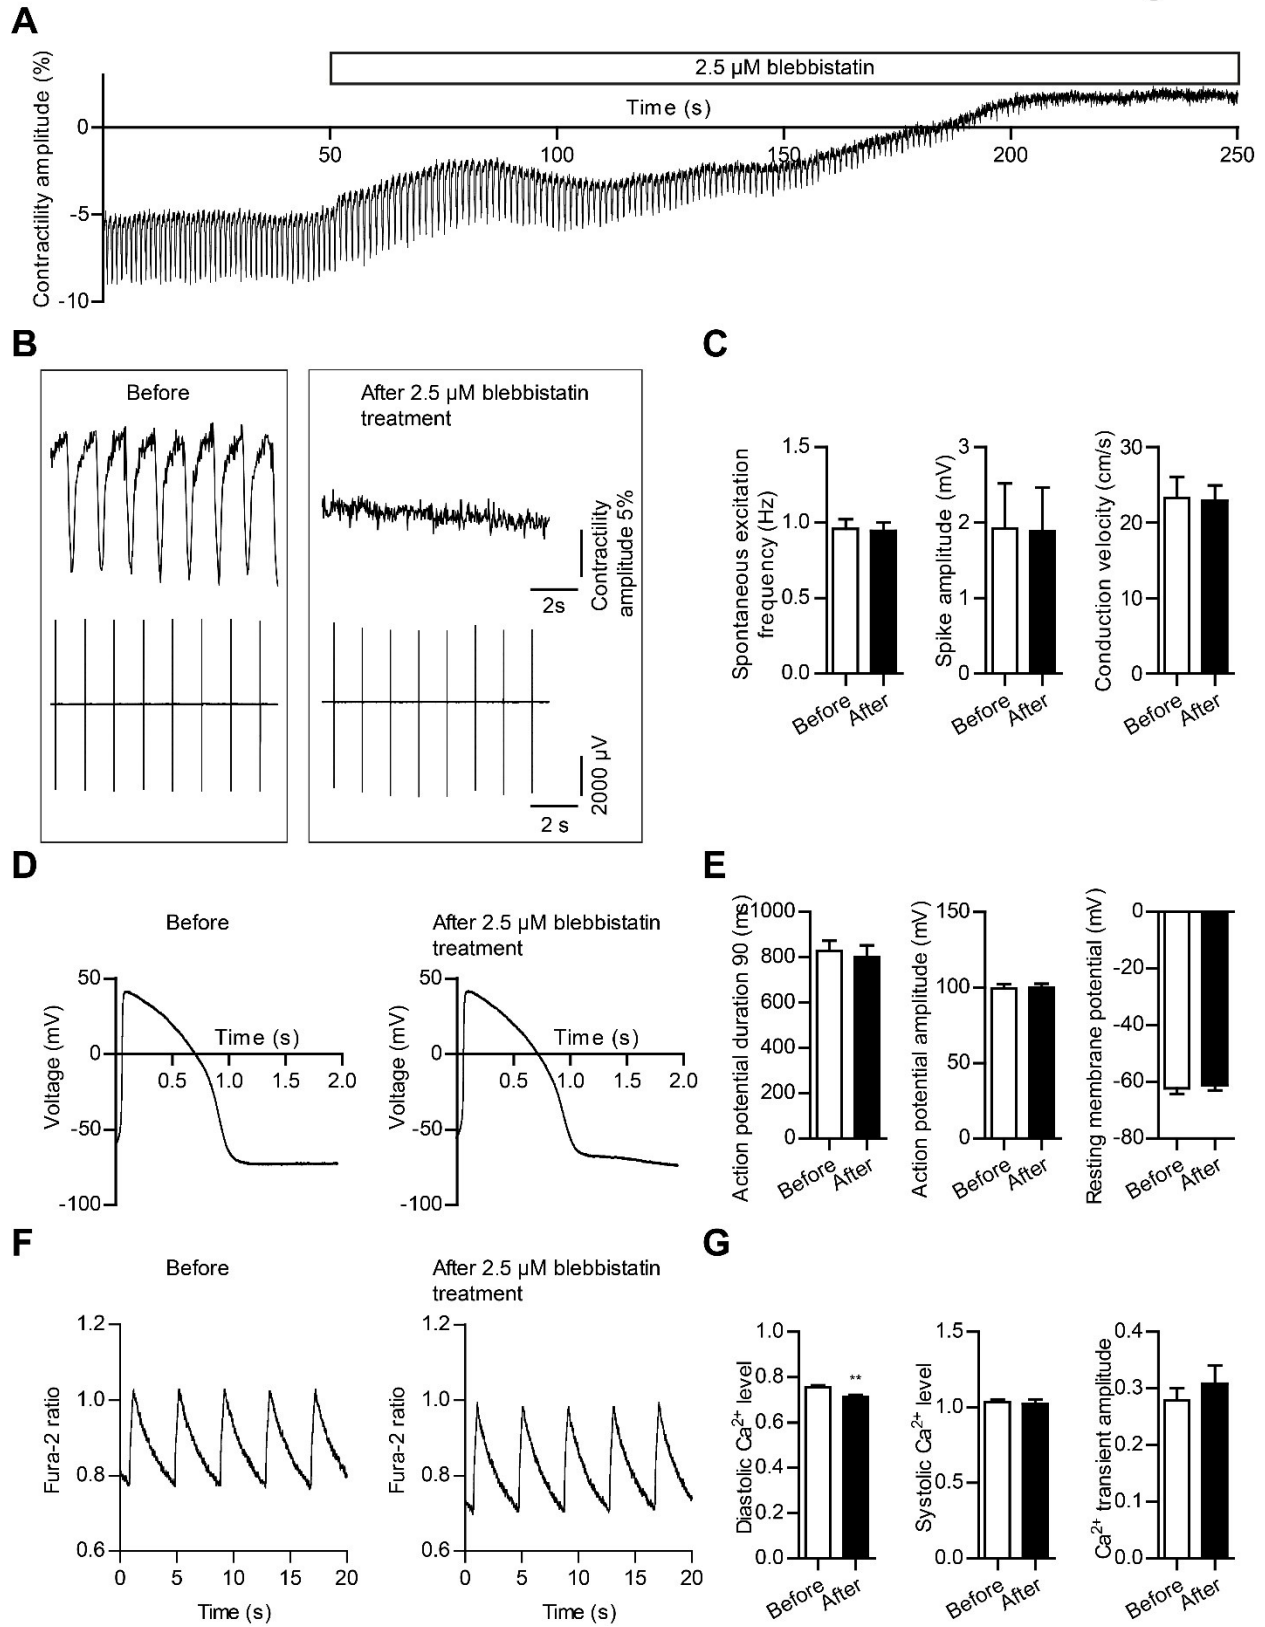

417 **Figure 2. Blebbistatin uncouples the excitation and contraction of iPSC-CMs.** (A) The  
418 representative contractility trace demonstrated the iPSC-CM monolayer culture stopped beating  
419 3–5 minutes after 2.5  $\mu\text{M}$  BB treatment. (B) Original contractility and FP traces in the same iPSC-  
420 CM culture before and after 2.5  $\mu\text{M}$  BB treatment. (C) Statistical analyses of FP metrics:  
421 spontaneous excitation frequency (**left**), spike amplitude (**middle**), and conduction velocity (**right**).  
422  $n = 14$  cultures from 5 differentiation experiments for spontaneous excitation frequency and spike  
423 amplitude.  $n = 7$  cultures from 3 differentiation experiments for conduction velocity. (D)  
424 Representative 0.5 Hz paced AP before and after 2.5  $\mu\text{M}$  BB treatment for 10 minutes. (E)  
425 Statistical analyses of AP metrics: AP duration 90 (**left**), AP amplitude (**middle**), and resting  
426 membrane potential (**right**).  $n = 11$  cells from 5 differentiation experiments for all the three AP  
427 parameters. (F) Representative 0.25 Hz paced calcium transients before and after 2.5  $\mu\text{M}$  BB 5  
428 min treatment. (G) Statistical analyses of calcium transients metrics: diastolic  $\text{Ca}^{2+}$  level (**left**), and  
429 systolic  $\text{Ca}^{2+}$  level (**middle**) and  $\text{Ca}^{2+}$  transients amplitude (**right**).  $n = 18$  from 4 differentiation  
430 experiments for all the three calcium transients parameters. Data are represented as mean  $\pm$  SEM.  
431  $p < 0.05$  was considered as significant under the paired Student's  $t$ -test (\*\* $p < 0.001$ ).

432

**Figure 3**

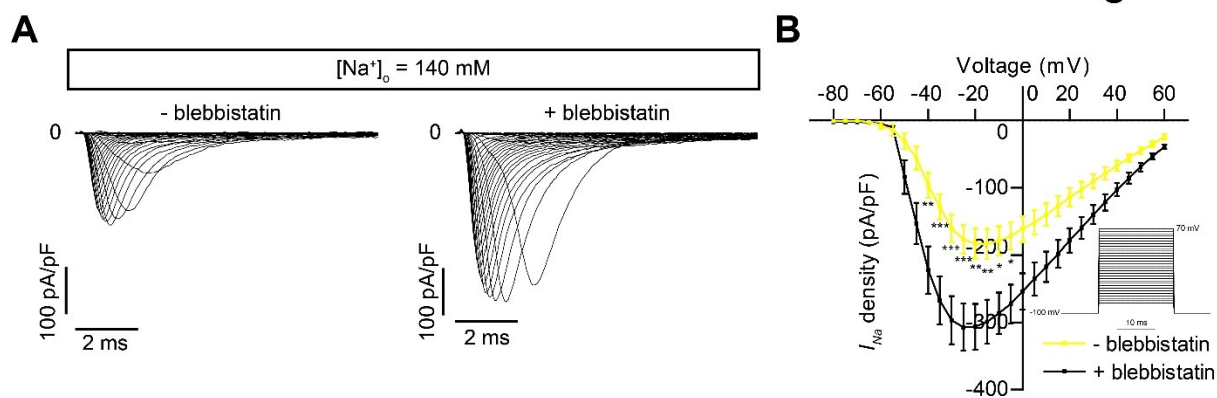

433

434 **Figure 3.  $I_{Na}$  (under 140 mM  $[Na^+]_o$ ) recording with/without BB buffering. (A)** The  
435 representative  $I_{Na}$  traces in 140 mM  $[Na^+]_o$  buffered with 2.5  $\mu$ M BB in the whole procedures  
436 (including dissociation, filtration, storage, and recording), or without BB. **(B)** Statistical analysis  
437 of  $I_{Na}$  in 140 mM  $[Na^+]_o$  ( $\pm$  blebbistatin buffered whole procedure). -blebbistatin: n = 29 cells from  
438 6 differentiation experiments; +blebbistatin: n = 51 cells from 9 differentiation experiments. The  
439 stimulation protocol is shown as an inset. The stimulation protocol is shown as an inset. Data are  
440 represented as mean  $\pm$  SEM. \*p <0.05; \*\*p <0.01; \*\*\*p <0.001 by two-way ANOVA with  
441 Bonferroni post-test.

Figure 4

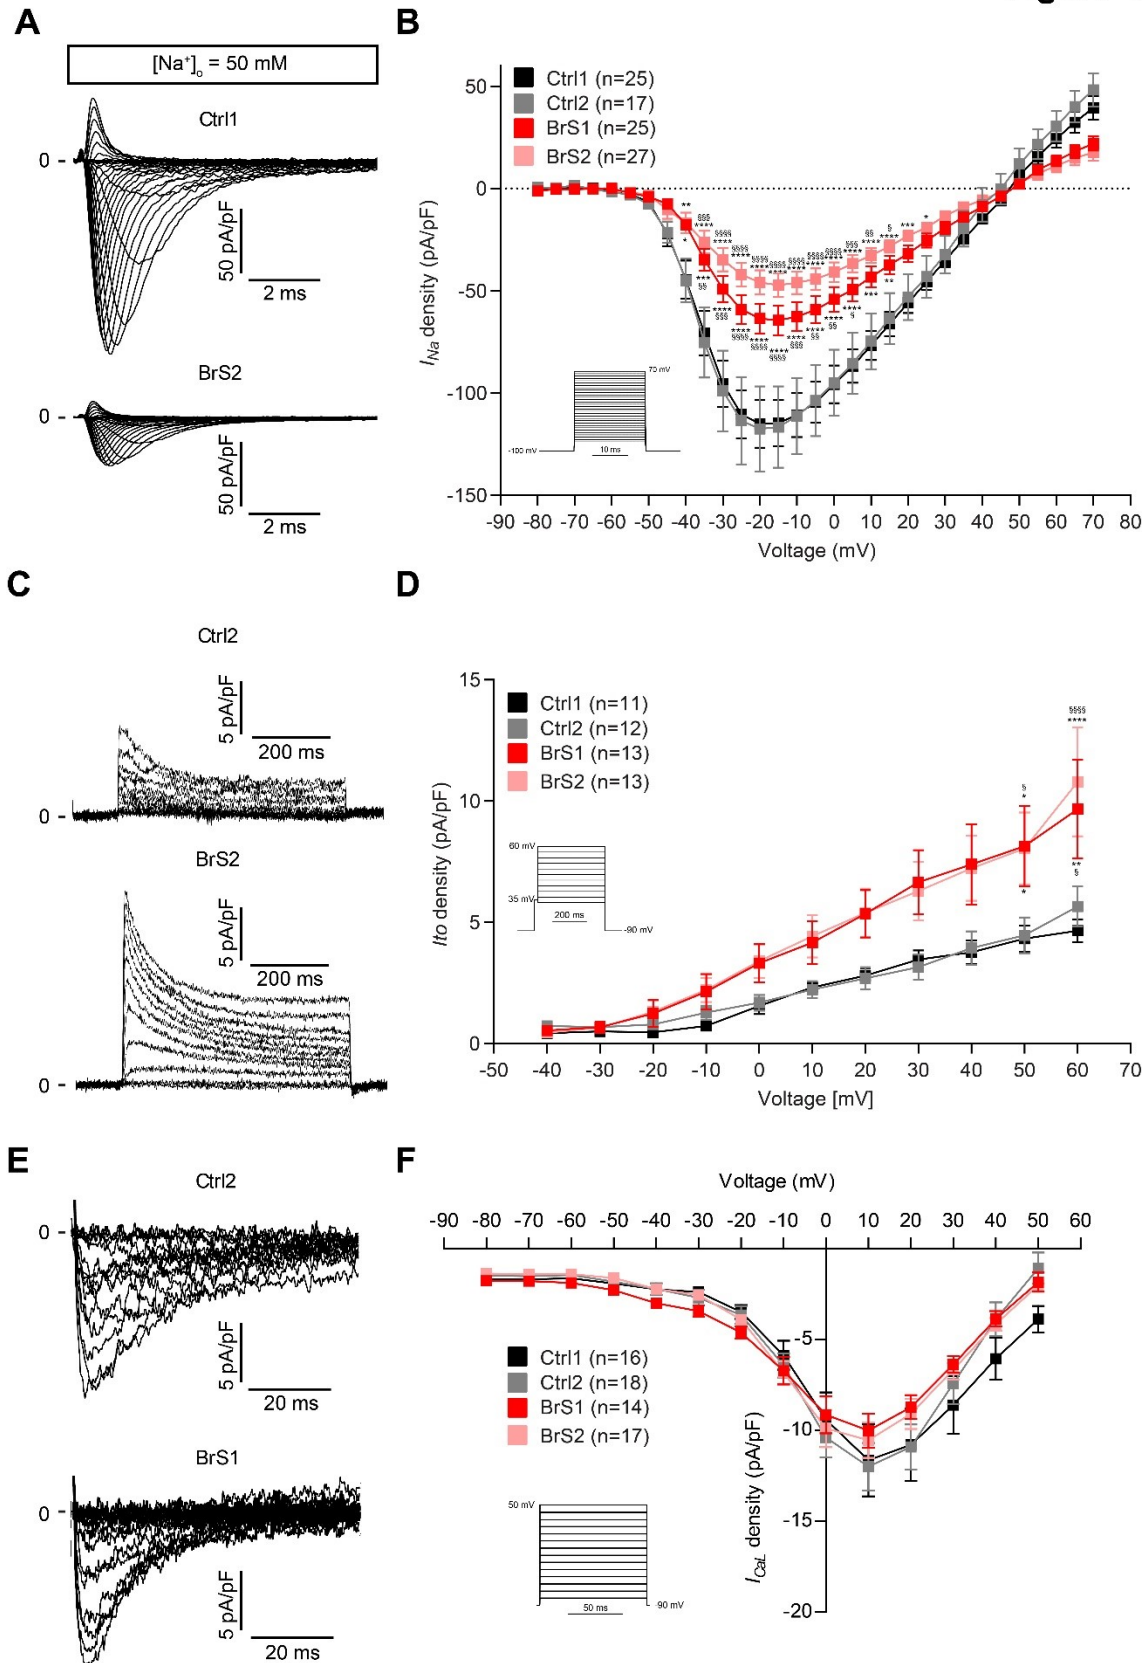



443 **Figure 4.  $I_{Na}$  (under 50 mM  $[Na^+]_o$ ),  $I_{to}$  and  $I_{CaL}$  recording for Ctrl- and BrS-CMs buffered**  
444 **with 2.5  $\mu$ M BB in the whole procedure. (A)** Shown are  $I_{Na}$  recordings (under 50 mM  $[Na^+]_o$ ) in  
445 Ctrl1- and BrS2-CMs. **(B)** The  $I-V$  curve of  $I_{Na}$  for Ctrl1-, Ctrl2-, BrS1- and BrS2-CMs. Ctrl1: n =  
446 25 cells from 4 differentiation experiments; Ctrl2: n = 17 cells from 3 differentiations; BrS1: n =  
447 25 cells from 7 differentiations; BrS2: n = 27 cells from 7 differentiations. **(C)** Representative  
448 traces of  $I_{to}$  in Ctrl2- and BrS2-CMs. **(D)**  $I_{to}$  density plot in Ctrl1-, Ctrl2-, BrS1, and BrS2-CMs.  
449 Ctrl1: n = 11 cells from 4 differentiations; Ctrl2: n = 12 cells from 6 differentiations; BrS1: n = 13  
450 cells from 6 differentiations; BrS2: n = 13 cells from 5 differentiations. **(E)** Shown are  $I_{CaL}$   
451 recording in Ctrl2- and BrS1-CMs. **(F)** The  $I-V$  curve of  $I_{CaL}$  for Ctrl1-, Ctrl2-, BrS1- and BrS2-  
452 CMs. Ctrl1: n = 16 cells from 5 differentiations; Ctrl2: n = 18 cells from 7 differentiations; BrS1:  
453 n = 14 cells from 4 differentiations; BrS2: n = 17 cells from 3 differentiations. The stimulation  
454 protocols are shown as insets. Data are represented as mean  $\pm$  SEM. \*p <0.05; \*\*p <0.01; \*\*\*p  
455 <0.001; \*\*\*\*p <0.0001 BrS vs. Ctrl1 by using two-way ANOVA with Bonferroni post-test. §p  
456 <0.05; §§p <0.01; §§§p <0.001; §§§§p <0.0001 BrS vs. Ctrl2 by using two-way ANOVA with  
457 Bonferroni post-test.  
458
